# Supplementary material
Source: Springer Nature journal article supplement (https://www.springermedizin.de/resource/supplementary/12936_2009_1133_MOESM1_ESM.pdf/9549936)

**Total chloroquine concentration on on Day-3 (ng/mL)**

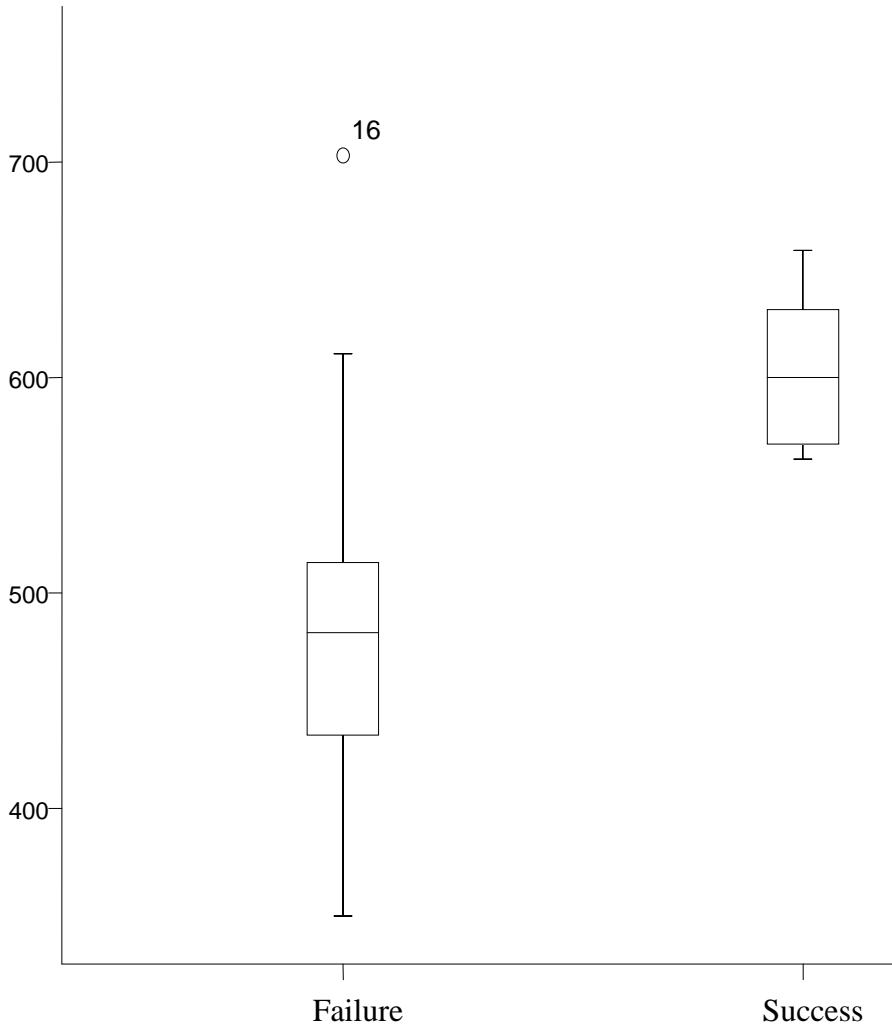

Supplement: MOESM1 [file 9549936]
